# Supplementary material for: Pharmacological but not physiological GDF15 suppresses feeding and the motivation to exercise
Source: PubMed Central journal article supplement (PMC7884842; doi:10.1038/s41467-021-21309-x), 2021-02-15
Supplement: 41467_2021_21309_MOESM1_ESM.pdf [file 41467_2021_21309_MOESM1_ESM.pdf]

**SUPPLEMENTARY INFORMATION**

**Pharmacological but not physiological GDF15 suppresses feeding and the motivation to  
exercise**

Anders B. Klein *et al*

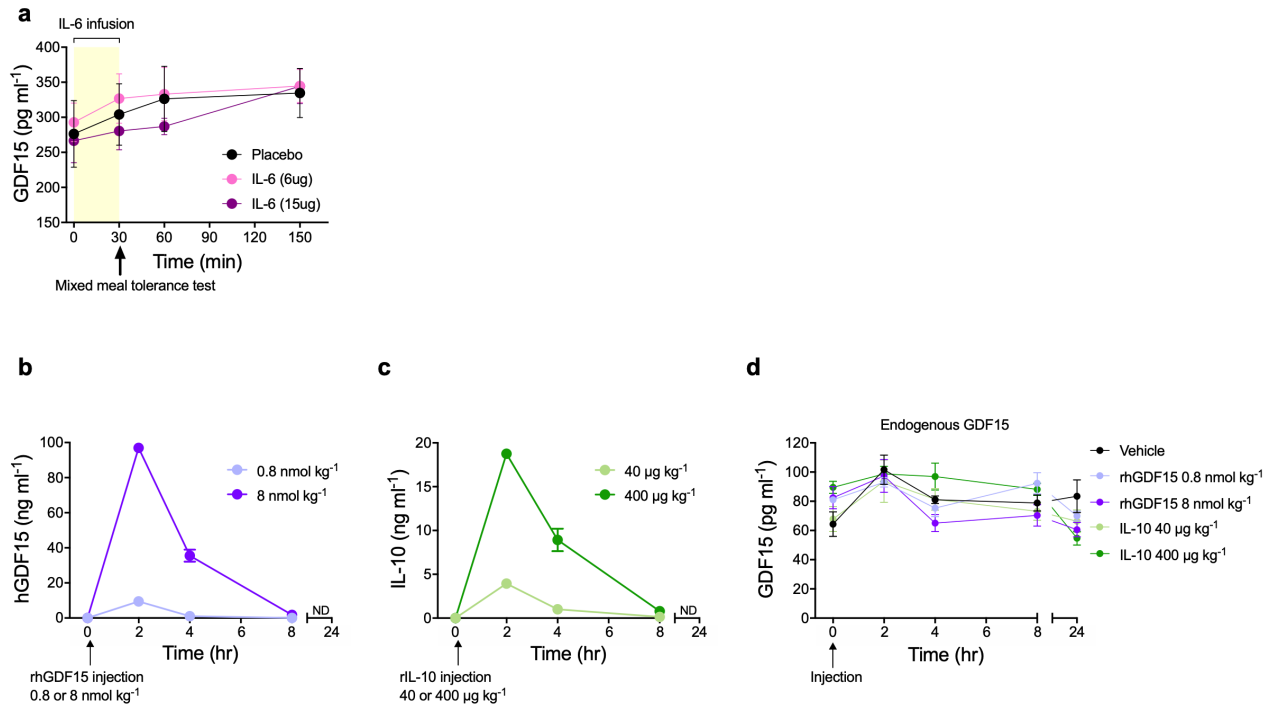

**Supplementary Figure 1 | Effect of rhIL-6 infusion on circulating GDF15 levels in healthy humans and effects of rhGDF15 and rmIL-10 administrations on circulating GDF15 in mice. a,** Plasma GDF15 concentration during IL-6 infusion followed by a mixed meal tolerance test, n=7. **b-d,** Plasma GDF15 levels after a single subcutaneous injection of either vehicle (n=4), rhGDF15 (0.8 nmol kg<sup>-1</sup>, n=4 or 8 nmol kg<sup>-1</sup>, n=4) or IL-10 (40 μg kg<sup>-1</sup>, n=4 or 400 μg kg<sup>-1</sup>, n=4). Data are presented as means ± SEM. Source data are provided as a Source Data file.

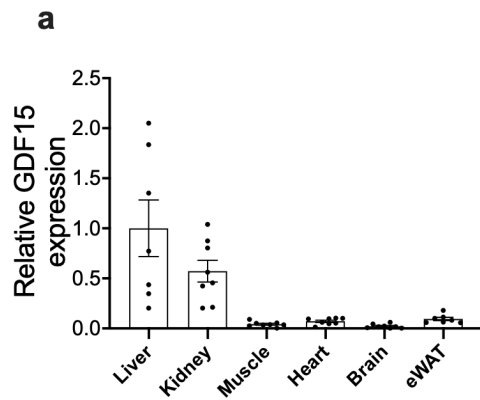

**Supplementary Figure 2 | *Gdf15* mRNA expression in mouse tissues.** **a**, Mouse tissue panel of *Gdf15* expression. *Gdf15* mRNA was normalized to reference gene *Rpl13a* and subsequently the normalized tissue *Gdf15* enrichment was compared relative to liver expression. n=8 (liver, n=7 and eWAT, n=7). Data are presented as means ± SEM. Source data are provided as a Source Data file.

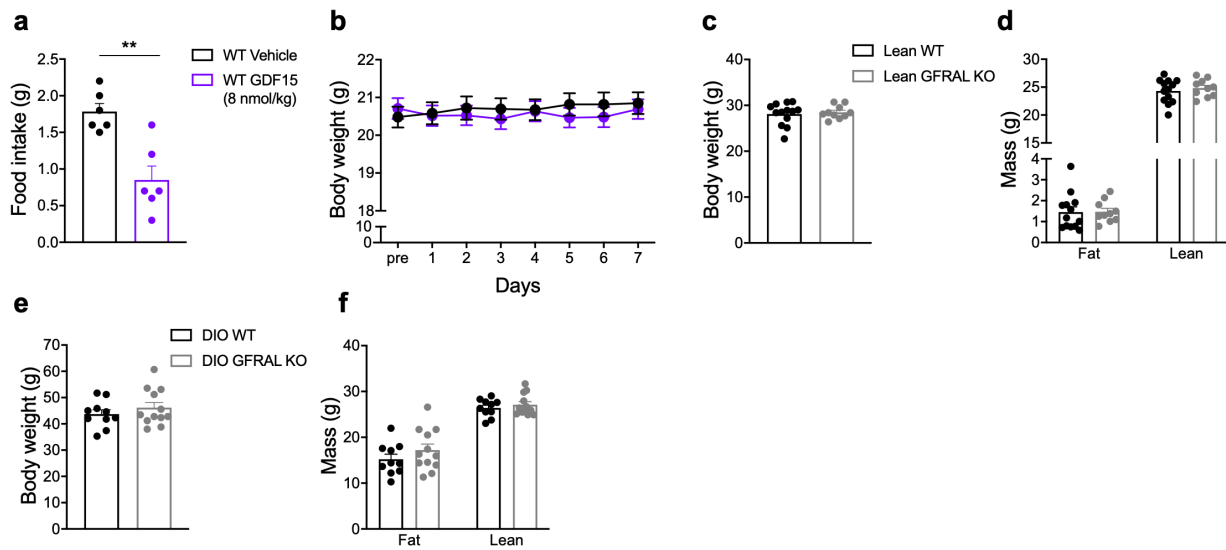

**SupplementaryFigure 3 | Effect of rhGDF15 administration on overnight feeding in DIO mice, on body weight during a 7-day voluntary running study in chow-fed mice, and on body composition in WT and GFRAL KO mice on chow and HFD respectively.** **a**, Overnight food intake of diet-induced obese (DIO) mice acutely treated with vehicle (n=6) or rhGDF15 (n=6, p=0.0018). **b**, Body weight in lean mice treated daily with vehicle (n=16) or rhGDF15 (n=15) while having free access to running wheels. **c**, Body weight and **d**, Body composition in lean WT (n=13) and GFRAL KO (n=10) mice. **e**, Body weight and **f**, body composition in DIO WT (n=10) and GFRAL KO (n=12) mice. Data are presented as means  $\pm$  SEM. \*\* P < 0.01, two-tailed unpaired t-test. Source data are provided as a Source Data file.

**Supplementary Table 1. Plasma samples from studies on human subjects**

| <b>Human Study</b> | <b>Figure</b> | <b>Intervention</b>               | <b>Reference</b> |
|--------------------|---------------|-----------------------------------|------------------|
| Study 1            | Fig.1a        | Endurance vs. resistance exercise | 25               |
| Study 2            | Fig.1b        | Cycling                           | 26               |
| Study 3            | Fig.1c        | Marathon run                      | 27               |
| Study 4            | Fig.1d        | Cycling and diet interventions    | 29               |
| Study 5            | Fig.S1        | IL-6 infusion                     | 28               |
| Study 6            | Fig.2J-M      | Acute overfeeding                 | This study       |

**Supplementary Table 2. Primers for RT-qPCR**

| <b>Primers for qPCR</b> | <b>Sequence</b>          |
|-------------------------|--------------------------|
| GDF15 F                 | CCGAGAGGACTCGAACTCAG     |
| GDF15 R                 | ACCCCAATCTCACCTCTGGA     |
| ATF4 F                  | GATGAGCTTCCTGAACAGCG     |
| ATF4 R                  | GCCAAGCCATCATCCATAGC     |
| ATF5 F                  | CTACCCCTCCATTCCAATTTC    |
| ATF5 R                  | TTCTTGACTGGCTTCTCACTTGTG |
| ATF6 F                  | TTATCAGCATAACAGCCTGCG    |
| ATF6 R                  | CTTGGGACTTTGAGCCTCTG     |
| Xbp1s F                 | CTGAGTCCGAATCAGGTGCAG    |
| Xbp1s R                 | GTCCATGGGAAGATGTTCTGG    |
| Erdj4 F                 | ATAAAAGCCCTGATGCTGAAGC   |
| Erdj4 R                 | GCCATTGGTAAAAGCACTGTGT   |
| CHOP F                  | CCACCACACCTGAAAGCAGAA    |
| CHOP R                  | AGGTGAAAGGCAGGGACTCA     |
| Rpl13a F                | GGAGGGGCAGGTTCTGGTAT     |
| Rpl13a R                | TGTTGATGCCTTCACAGCGT     |
